# Supplementary material
Source: MDPI journal article supplement (https://www.mdpi.com/2077-1312/11/10/2013)
Supplement: s1 [file s1]

Archive with 15 entries (15 files):
- Anzidei et al. Supplementary material_Ustica_jmse_REVISED.pdf
- Fig.S1_Wave_Climate_palermo.jpg
- Fig.S10_lighthouse_SLR_section_1_26.jpg
- Fig.S11_lighthouse_SLR_map_3_70.jpg
- Fig.S12_lighthouse_SLR_section_3_70.jpg
- Fig.S2_tide harmonic analysis.jpg
- Fig.S3_USIX_revised.png
- Fig.S4_Ustica harbor_SLR_map_1_26.jpg
- Fig.S5_Ustica harbor_SLR_map_3_70.jpg
- Fig.S6_Ustica harbor_SLR_sezioni_1_26_3_70.jpg
- Fig.S7_NPier_SLR_map_1_26.jpg
- Fig.S8_NPier_SLR_map_3_70.jpg
- Fig.S9_lighthouse_SLR_map_1_26.jpg
- Tab.S1_WL_flooding_areas.pdf
- Tab.S2_storm_WL.pdf
