# Supplementary material
Source: MDPI journal article supplement (https://www.mdpi.com/2077-1312/11/10/2013)
Supplement: s1 [file s1 › Tab.S1_WL_flooding_areas.pdf]

| CLIMATIC SCENARIO |      | RELATIVE SEA LEVEL |                  |                                |                       | FLOODED SURFACE    |                |                                |                        |
|-------------------|------|--------------------|------------------|--------------------------------|-----------------------|--------------------|----------------|--------------------------------|------------------------|
| SSP Scenario      | Year | Ordinary Condition |                  | MaxWL in Storm Surge Condition |                       | Ordinary Condition |                | MaxWL in Storm Surge Condition |                        |
|                   |      | SLR + VLM (mm)     | σ SLR + VLM (mm) | RT1 (SLR + VLM) (m)            | RT100 (SLR + VLM) (m) | SLR + VLM (mq)     | SLR + VLM (ha) | RT100 (SLR + VLM) (mq)         | RT100 (SLR + VLM) (ha) |
| Northern Pier     |      |                    |                  |                                |                       |                    |                |                                |                        |
| SSP1-26           | 2019 | 0                  | 45               | 6.5                            | 10.0                  |                    |                | 7713.1                         | 0.77                   |
|                   | 2030 | 50                 | 68               | 6.5                            | 10.1                  | 332                | 0.03           |                                |                        |
|                   | 2050 | 159                | 106              | 6.6                            | 10.2                  | 532                | 0.05           |                                |                        |
|                   | 2100 | 421                | 238              | 6.9                            | 10.4                  | 1148               | 0.11           |                                |                        |
|                   | 2150 | 659                | 400              | 7.5                            | 11.1                  | 1534               | 0.15           |                                |                        |
| SSP3-70           | 2030 | 49                 | 65               | 6.5                            | 10.2                  | 331                | 0.03           |                                |                        |
|                   | 2050 | 187                | 109              | 6.6                            | 10.2                  | 594                | 0.06           |                                |                        |
|                   | 2100 | 643                | 270              | 7.1                            | 10.7                  | 1510               | 0.15           |                                |                        |
|                   | 2150 | 1127               | 484              | 7.6                            | 11.1                  | 2103               | 0.21           |                                |                        |
| SSP5-85           | 2030 | 57                 | 62               | 6.5                            | 10.2                  | 343                | 0.03           | 7766.9                         | 0.78                   |
|                   | 2050 | 200                | 111              | 6.7                            | 10.2                  | 622                | 0.06           | 7766.9                         | 0.78                   |
|                   | 2100 | 741                | 277              | 7.2                            | 10.8                  | 1645               | 0.16           | 7916.3                         | 0.79                   |
|                   | 2150 | 1278               | 518              | 7.7                            | 11.3                  | 2280               | 0.23           | 8069.3                         | 0.81                   |
| Lighthouse        |      |                    |                  |                                |                       |                    |                |                                |                        |
| SSP1-26           | 2019 | 0                  | 45               | 6.7                            | 10.2                  |                    |                | 91910.7                        | 9.19                   |
|                   | 2030 | 50                 | 68               | 6.8                            | 10.2                  | 2369               | 0.24           |                                |                        |
|                   | 2050 | 159                | 106              | 6.9                            | 10.3                  | 4267               | 0.43           |                                |                        |
|                   | 2100 | 421                | 238              | 7.2                            | 10.6                  | 8679               | 0.87           |                                |                        |
|                   | 2150 | 659                | 400              | 7.8                            | 11.2                  | 11931              | 1.19           |                                |                        |
| SSP3-70           | 2030 | 49                 | 65               | 6.8                            | 10.3                  | 2286               | 0.23           |                                |                        |
|                   | 2050 | 187                | 109              | 6.9                            | 10.3                  | 4746               | 0.47           |                                |                        |
|                   | 2100 | 643                | 270              | 7.4                            | 10.8                  | 11717              | 1.17           |                                |                        |
|                   | 2150 | 1127               | 484              | 7.9                            | 11.3                  | 17207              | 1.72           |                                |                        |
| SSP5-85           | 2030 | 57                 | 62               | 6.8                            | 10.4                  | 2424               | 0.24           | 93997.4                        | 9.40                   |
|                   | 2050 | 200                | 111              | 6.9                            | 10.4                  | 4954               | 0.50           | 93997.4                        | 9.40                   |
|                   | 2100 | 741                | 277              | 7.5                            | 10.9                  | 12988              | 1.30           | 97819.2                        | 9.78                   |
|                   | 2150 | 1278               | 518              | 8.0                            | 11.4                  | 18675              | 1.87           | 101549.0                       | 10.15                  |
| Harbour           |      |                    |                  |                                |                       |                    |                |                                |                        |
| SSP1-26           | 2019 | 0                  | 45               | 5.4                            | 5.4                   |                    |                | 14266.5                        | 1.43                   |
|                   | 2030 | 50                 | 68               | 5.5                            | 5.5                   | 430                | 0.04           |                                |                        |
|                   | 2050 | 159                | 106              | 5.6                            | 5.6                   | 645                | 0.06           |                                |                        |
|                   | 2100 | 421                | 238              | 5.9                            | 5.9                   | 1251               | 0.13           |                                |                        |
|                   | 2150 | 659                | 400              | 6.5                            | 6.5                   | 1717               | 0.17           |                                |                        |
| SSP3-70           | 2030 | 49                 | 65               | 5.5                            | 5.6                   | 429                | 0.04           |                                |                        |
|                   | 2050 | 187                | 109              | 5.6                            | 5.6                   | 703                | 0.07           |                                |                        |
|                   | 2100 | 643                | 270              | 6.1                            | 6.1                   | 1682               | 0.17           |                                |                        |
|                   | 2150 | 1127               | 484              | 6.6                            | 6.6                   | 3180               | 0.32           |                                |                        |
| SSP5-85           | 2030 | 57                 | 62               | 5.5                            | 5.6                   | 444                | 0.04           | 14927.6                        | 1.49                   |
|                   | 2050 | 200                | 111              | 5.6                            | 5.6                   | 729                | 0.07           | 15086.3                        | 1.51                   |
|                   | 2100 | 741                | 277              | 6.2                            | 6.2                   | 1907               | 0.19           | 15529.6                        | 1.55                   |
|                   | 2150 | 1278               | 518              | 6.7                            | 6.7                   | 3781               | 0.38           | 15980.8                        | 1.60                   |
