# Supplementary material
Source: MDPI journal article supplement (https://www.mdpi.com/2077-1312/11/10/2013)
Supplement: s1 [file s1 › Tab.S2_storm_WL.pdf]

1
