# Supplementary material
Source: MDPI journal article supplement (https://www.mdpi.com/2077-1312/11/10/2013)

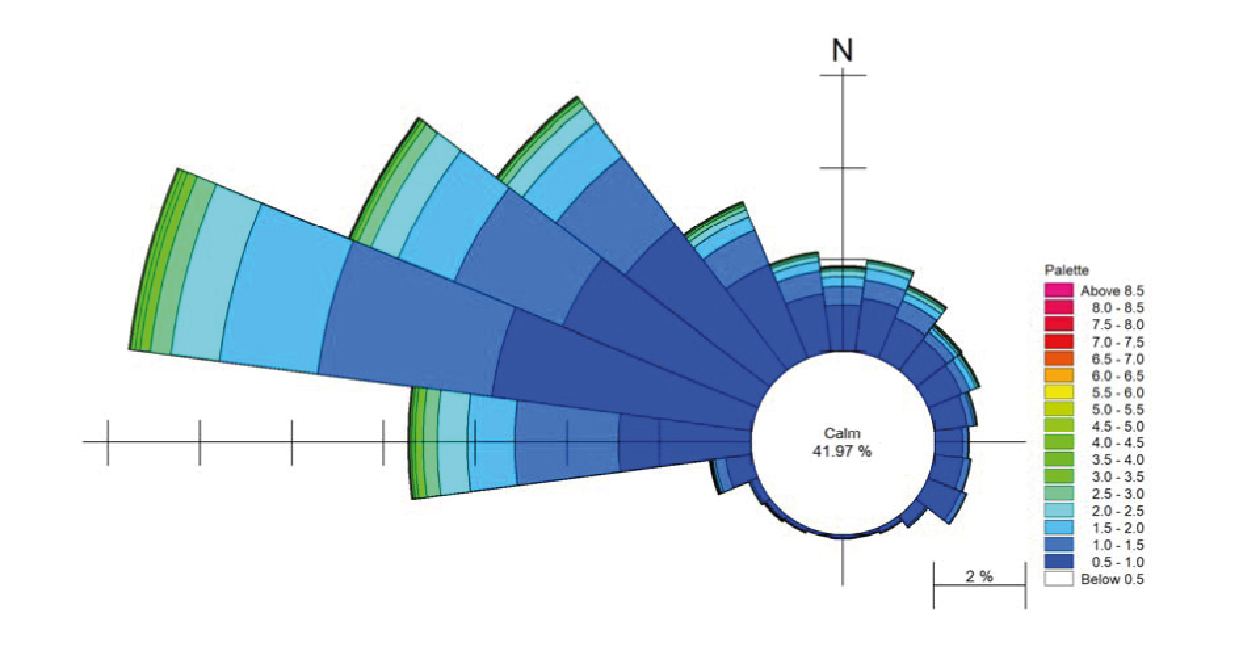

Supplement: s1 [file s1 › Fig.S1_Wave_Climate_palermo.jpg]

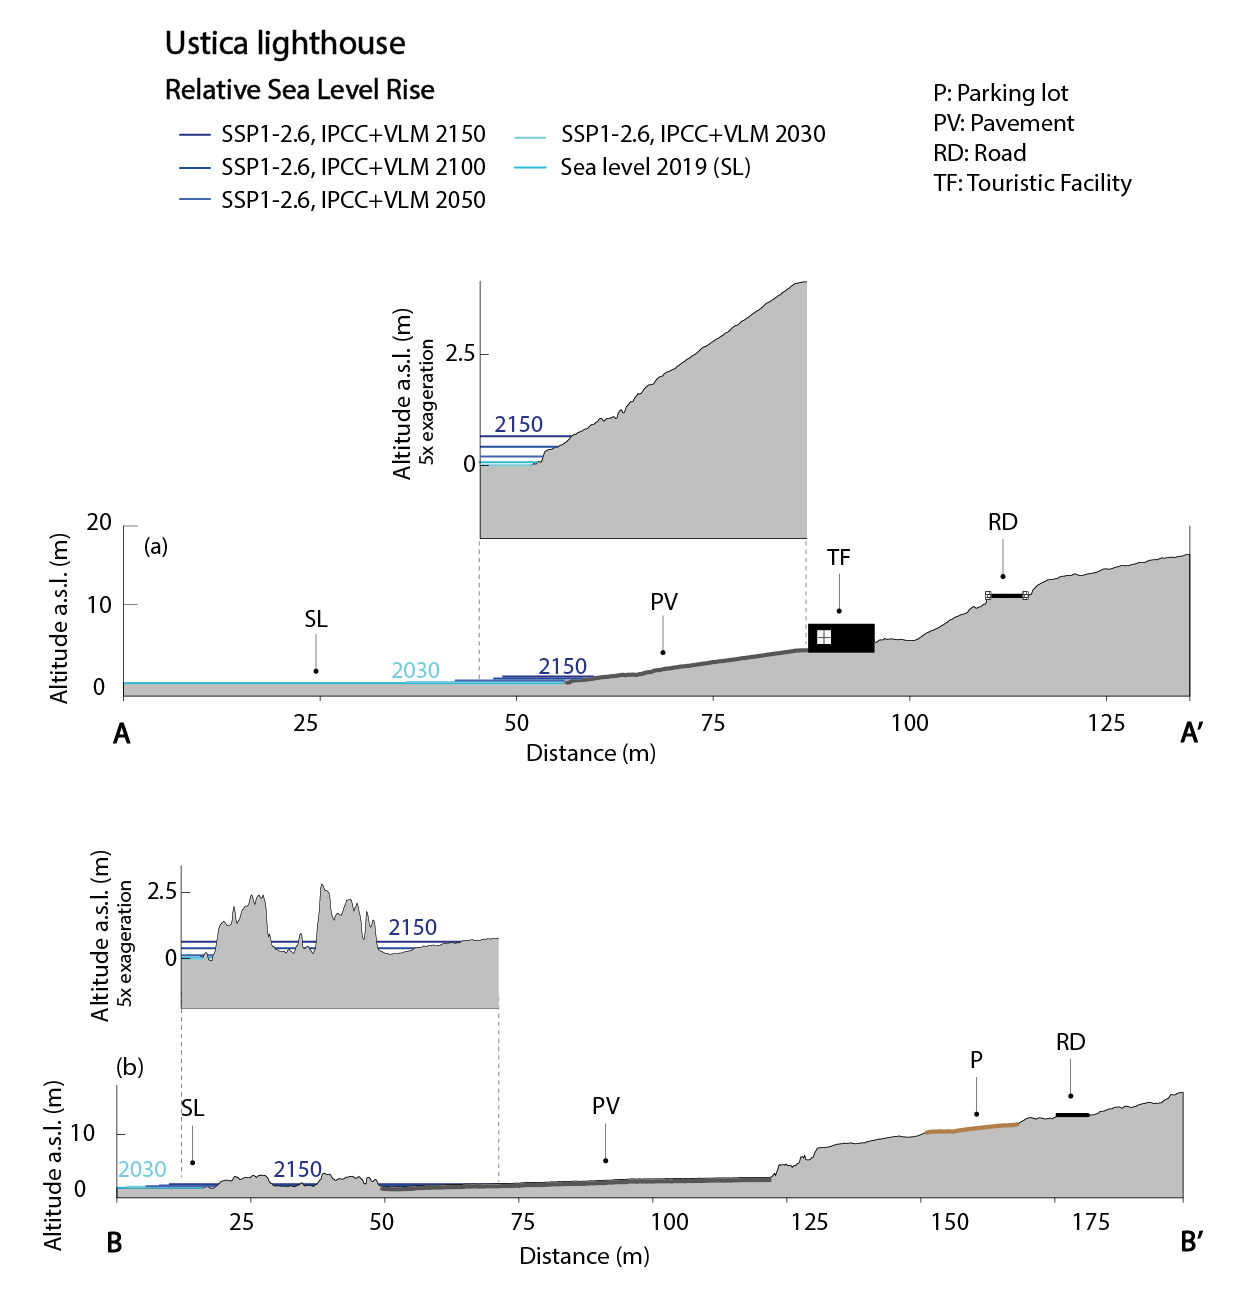

Supplement: s1 [file s1 › Fig.S10_lighthouse_SLR_section_1_26.jpg]

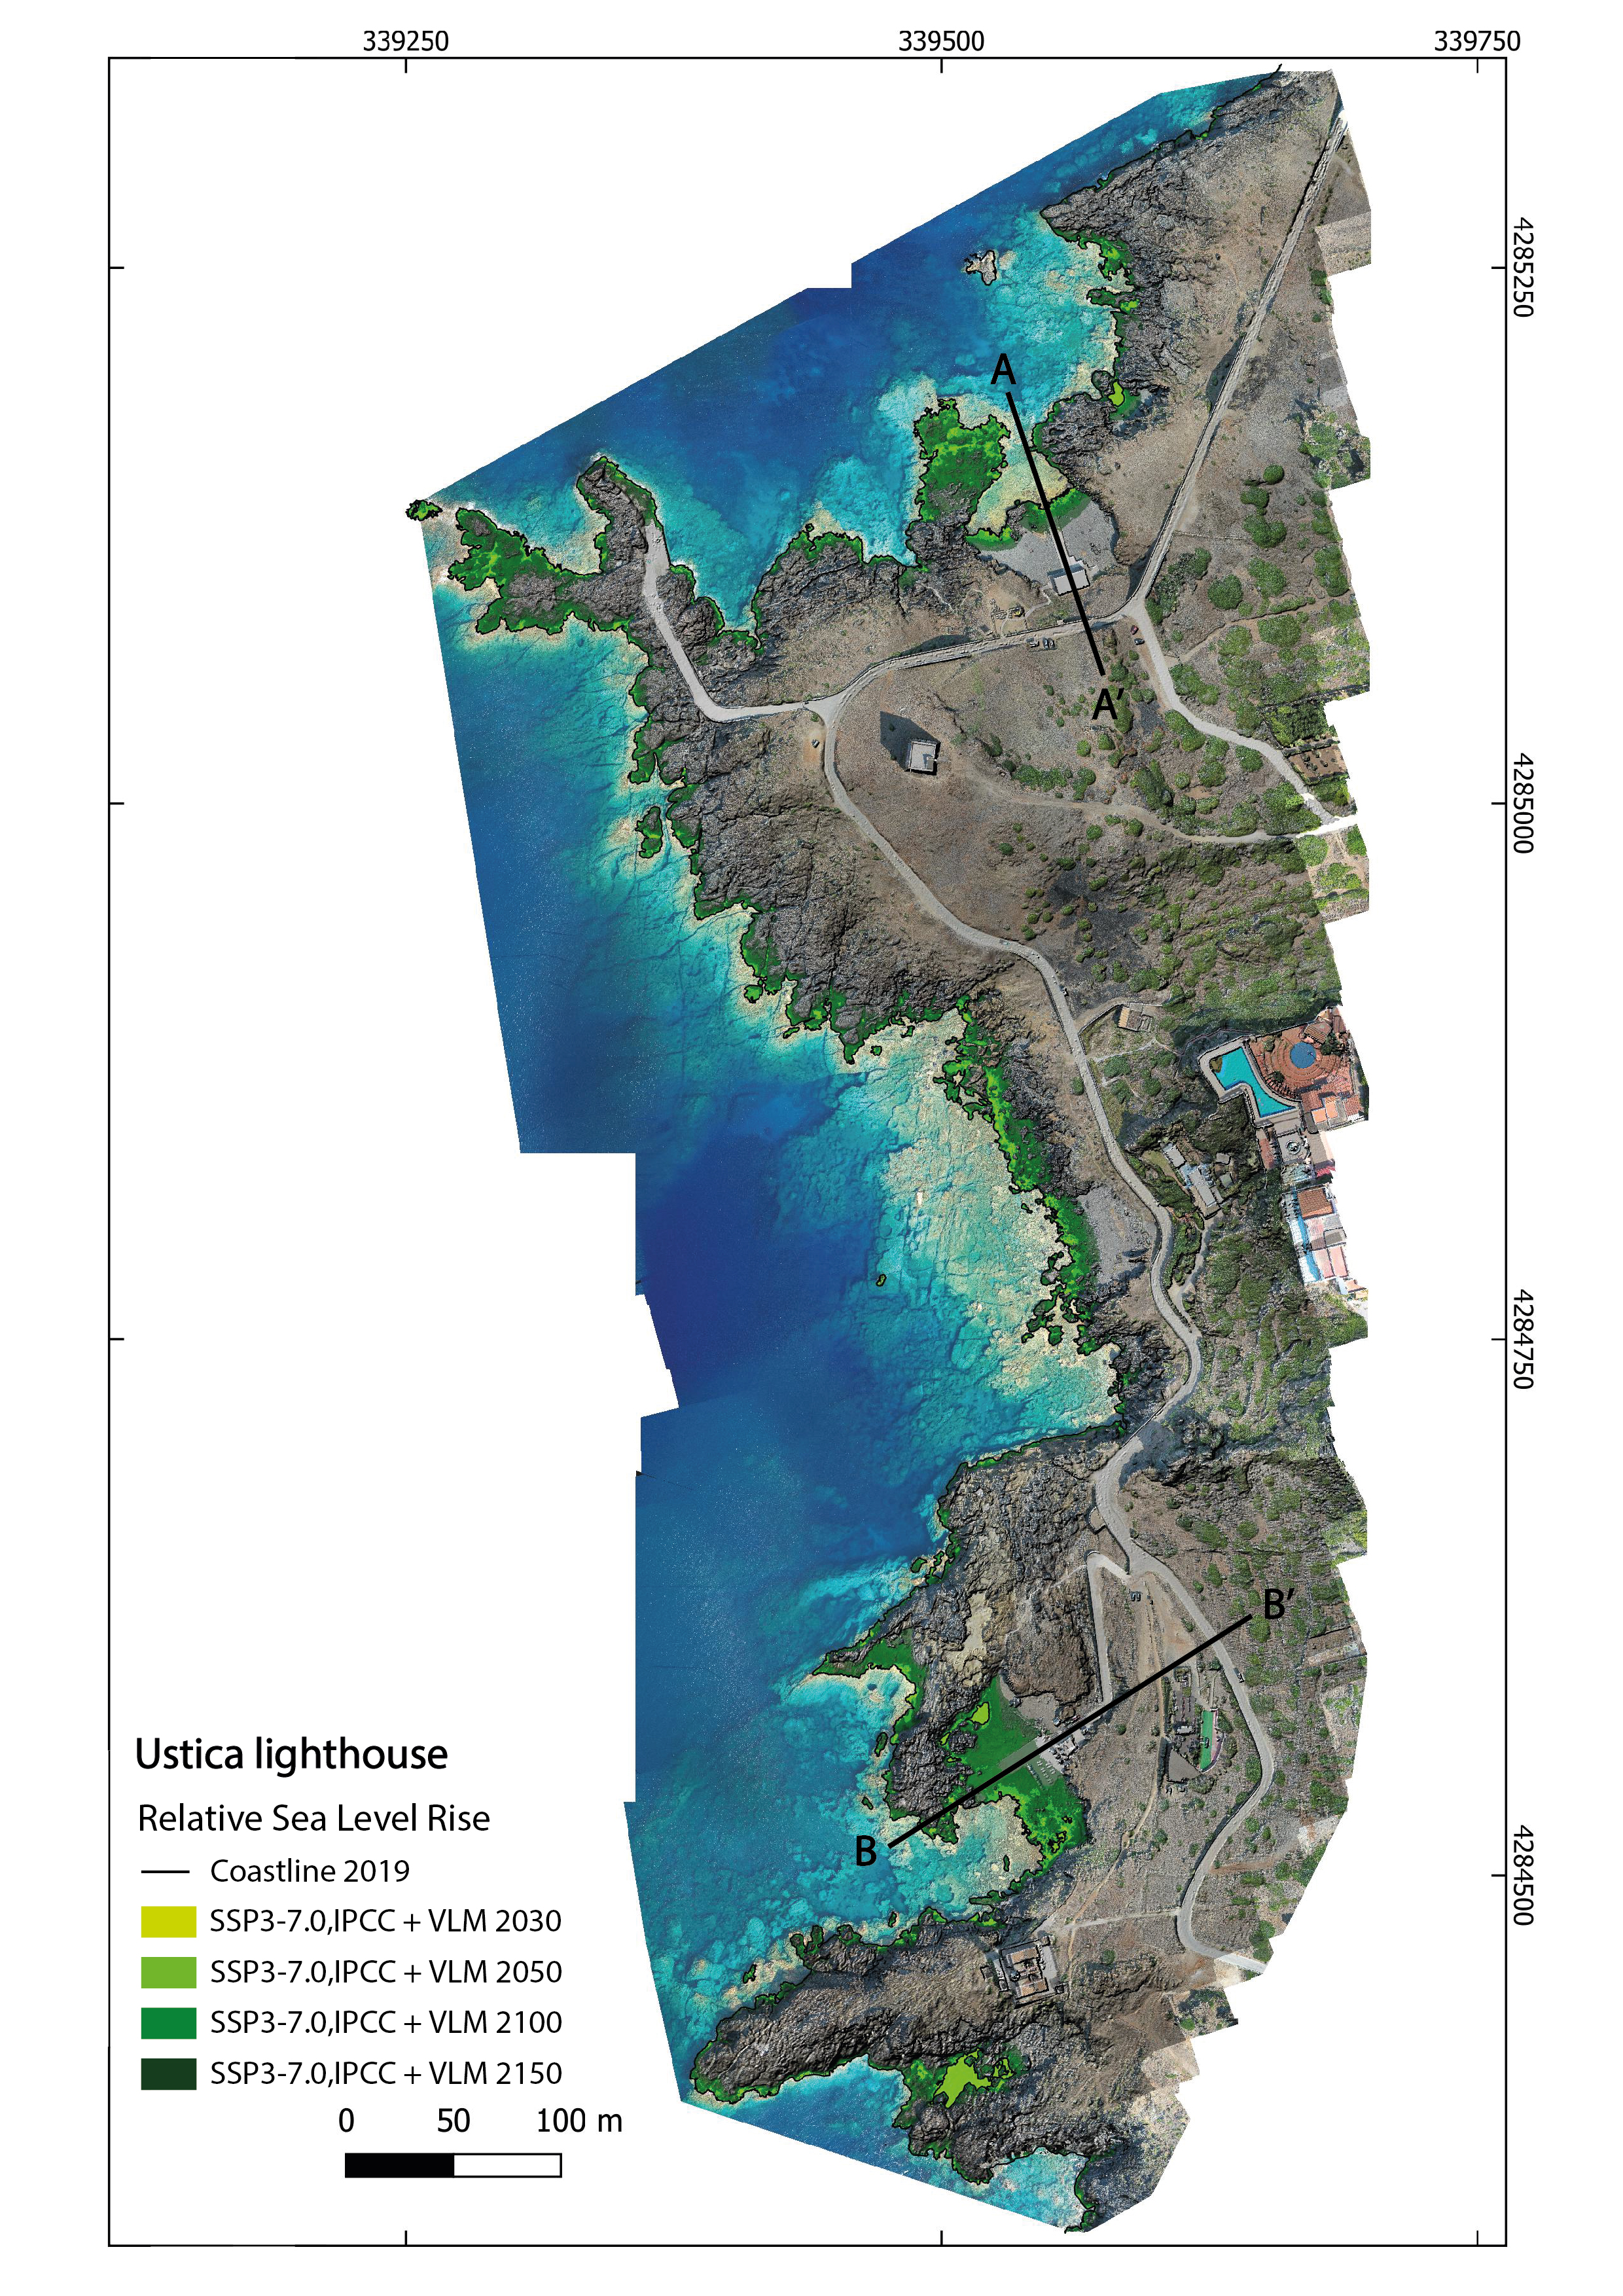

Supplement: s1 [file s1 › Fig.S11_lighthouse_SLR_map_3_70.jpg]

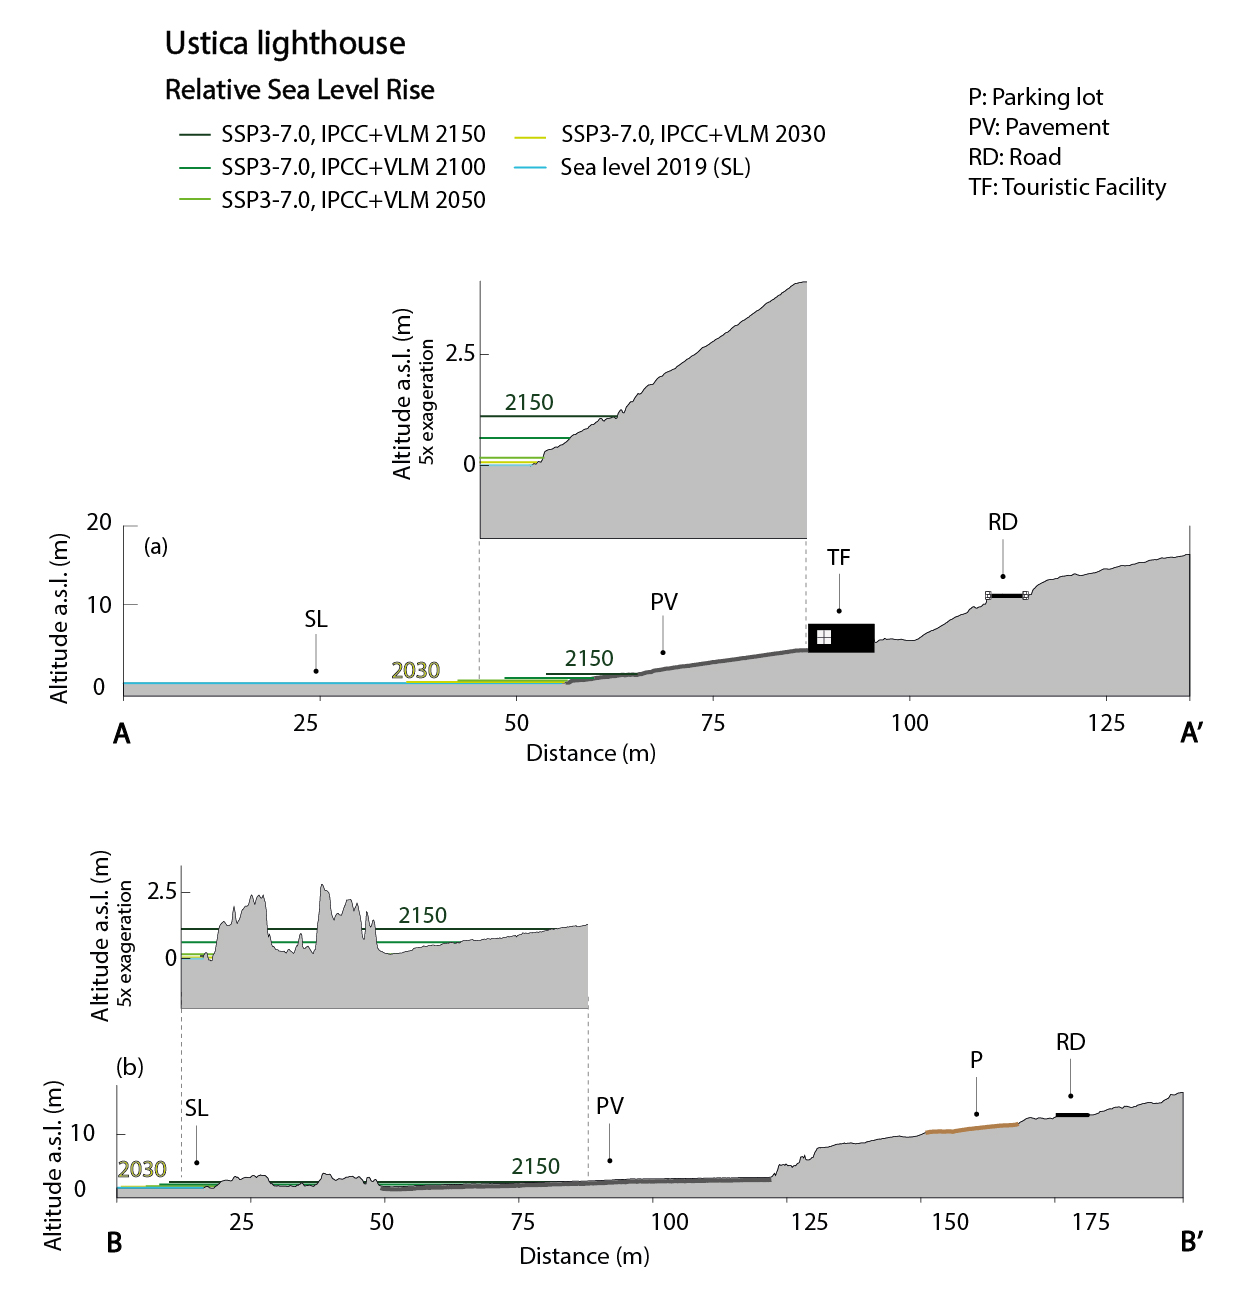

Supplement: s1 [file s1 › Fig.S12_lighthouse_SLR_section_3_70.jpg]

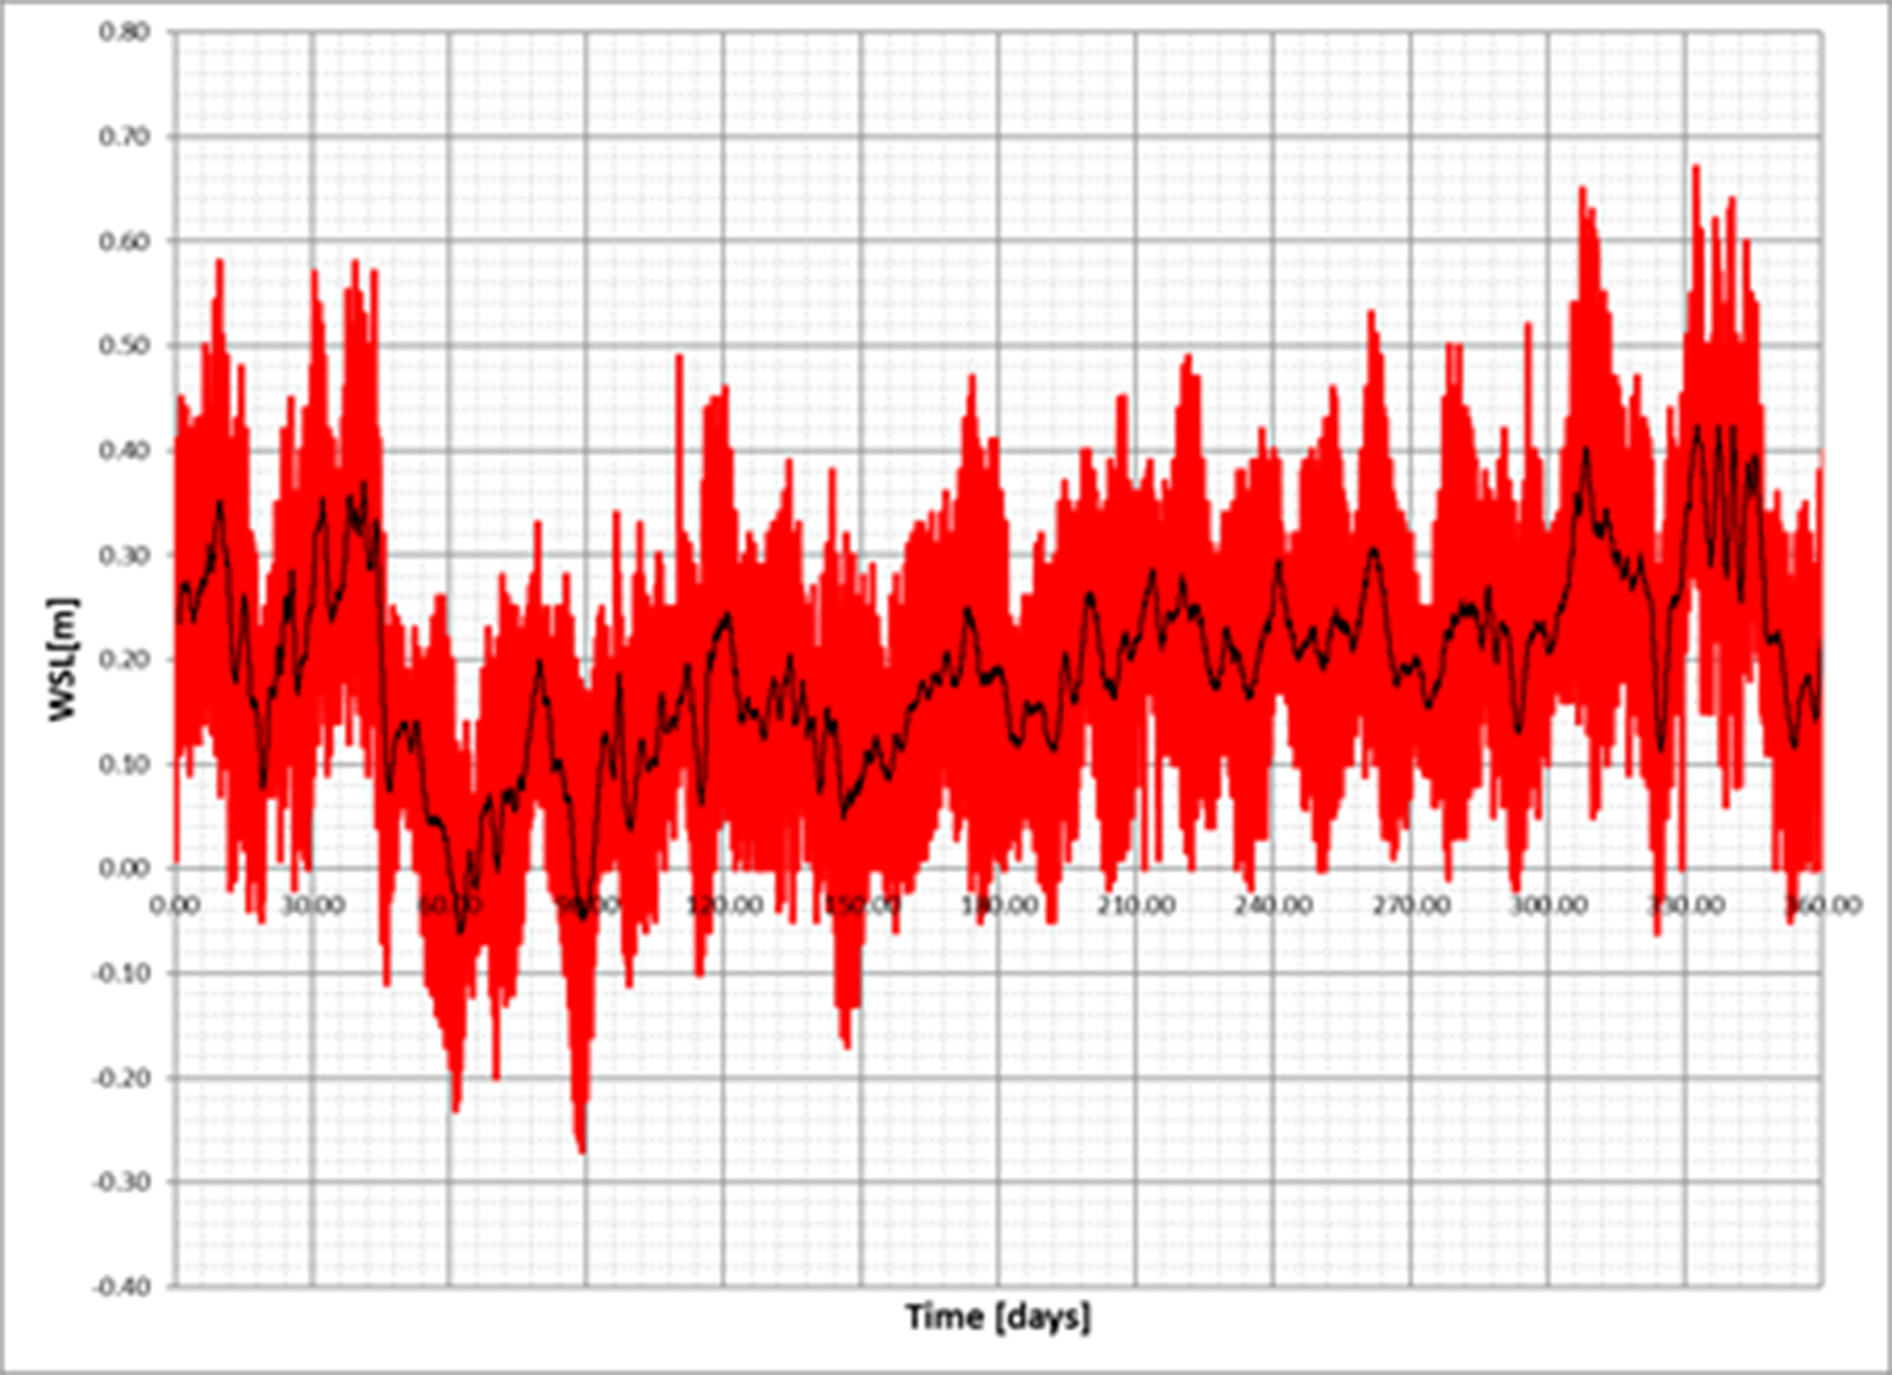

Supplement: s1 [file s1 › Fig.S2_tide harmonic analysis.jpg]

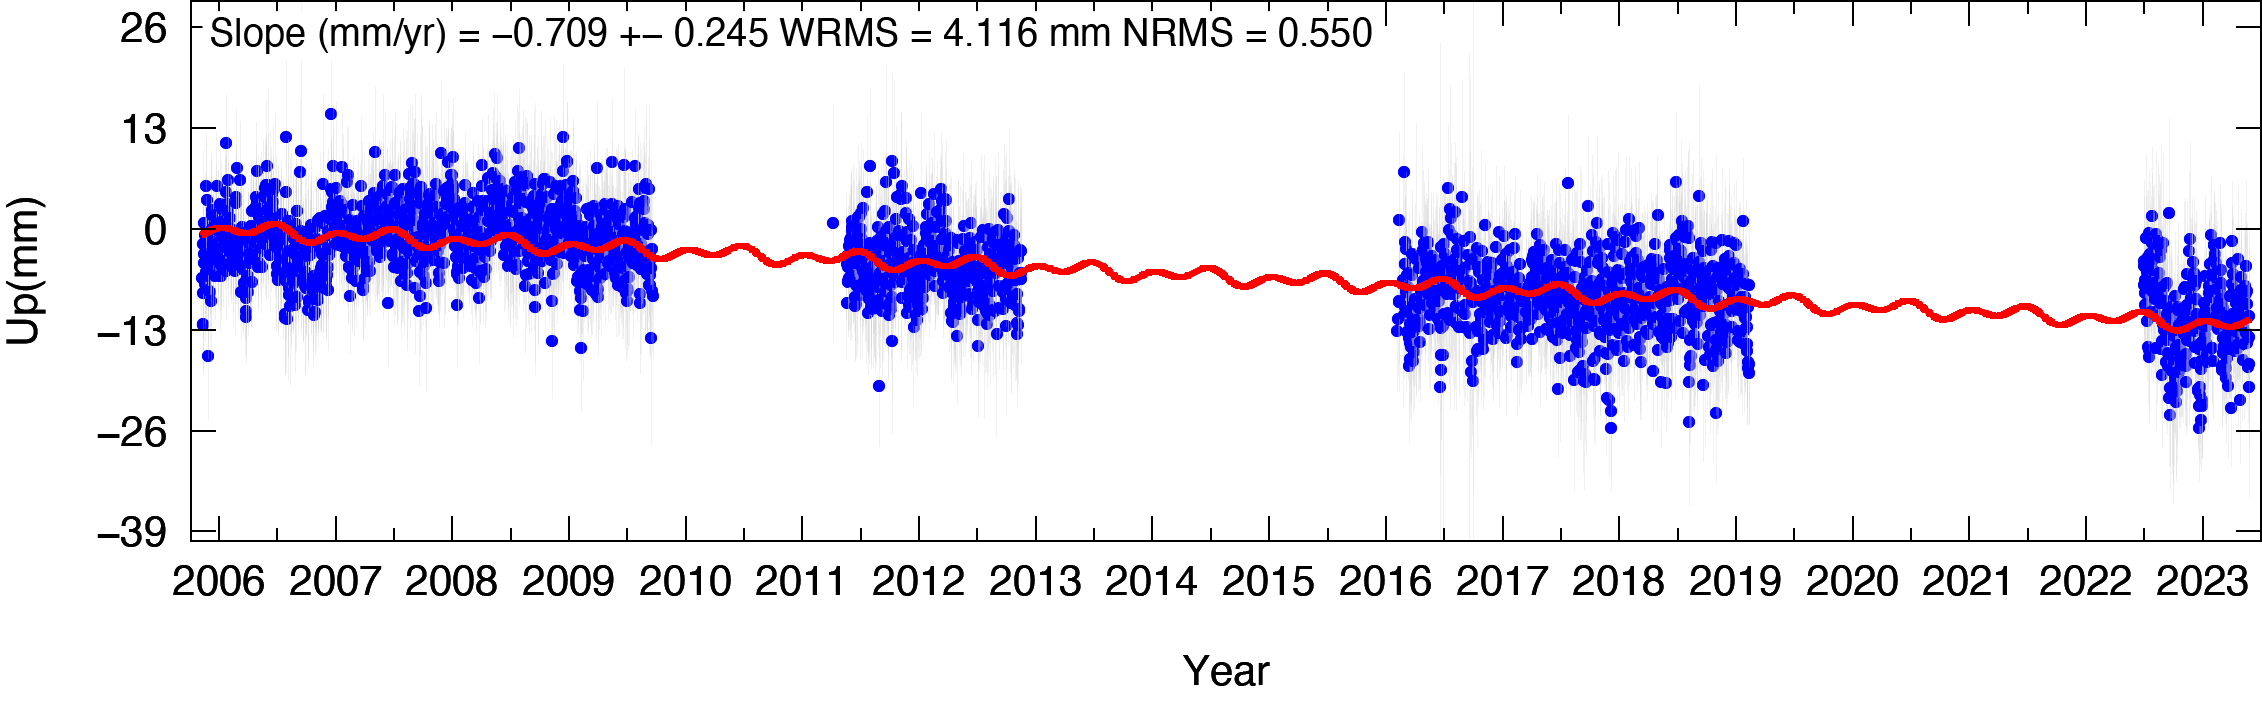

Supplement: s1 [file s1 › Fig.S3_USIX_revised.png]

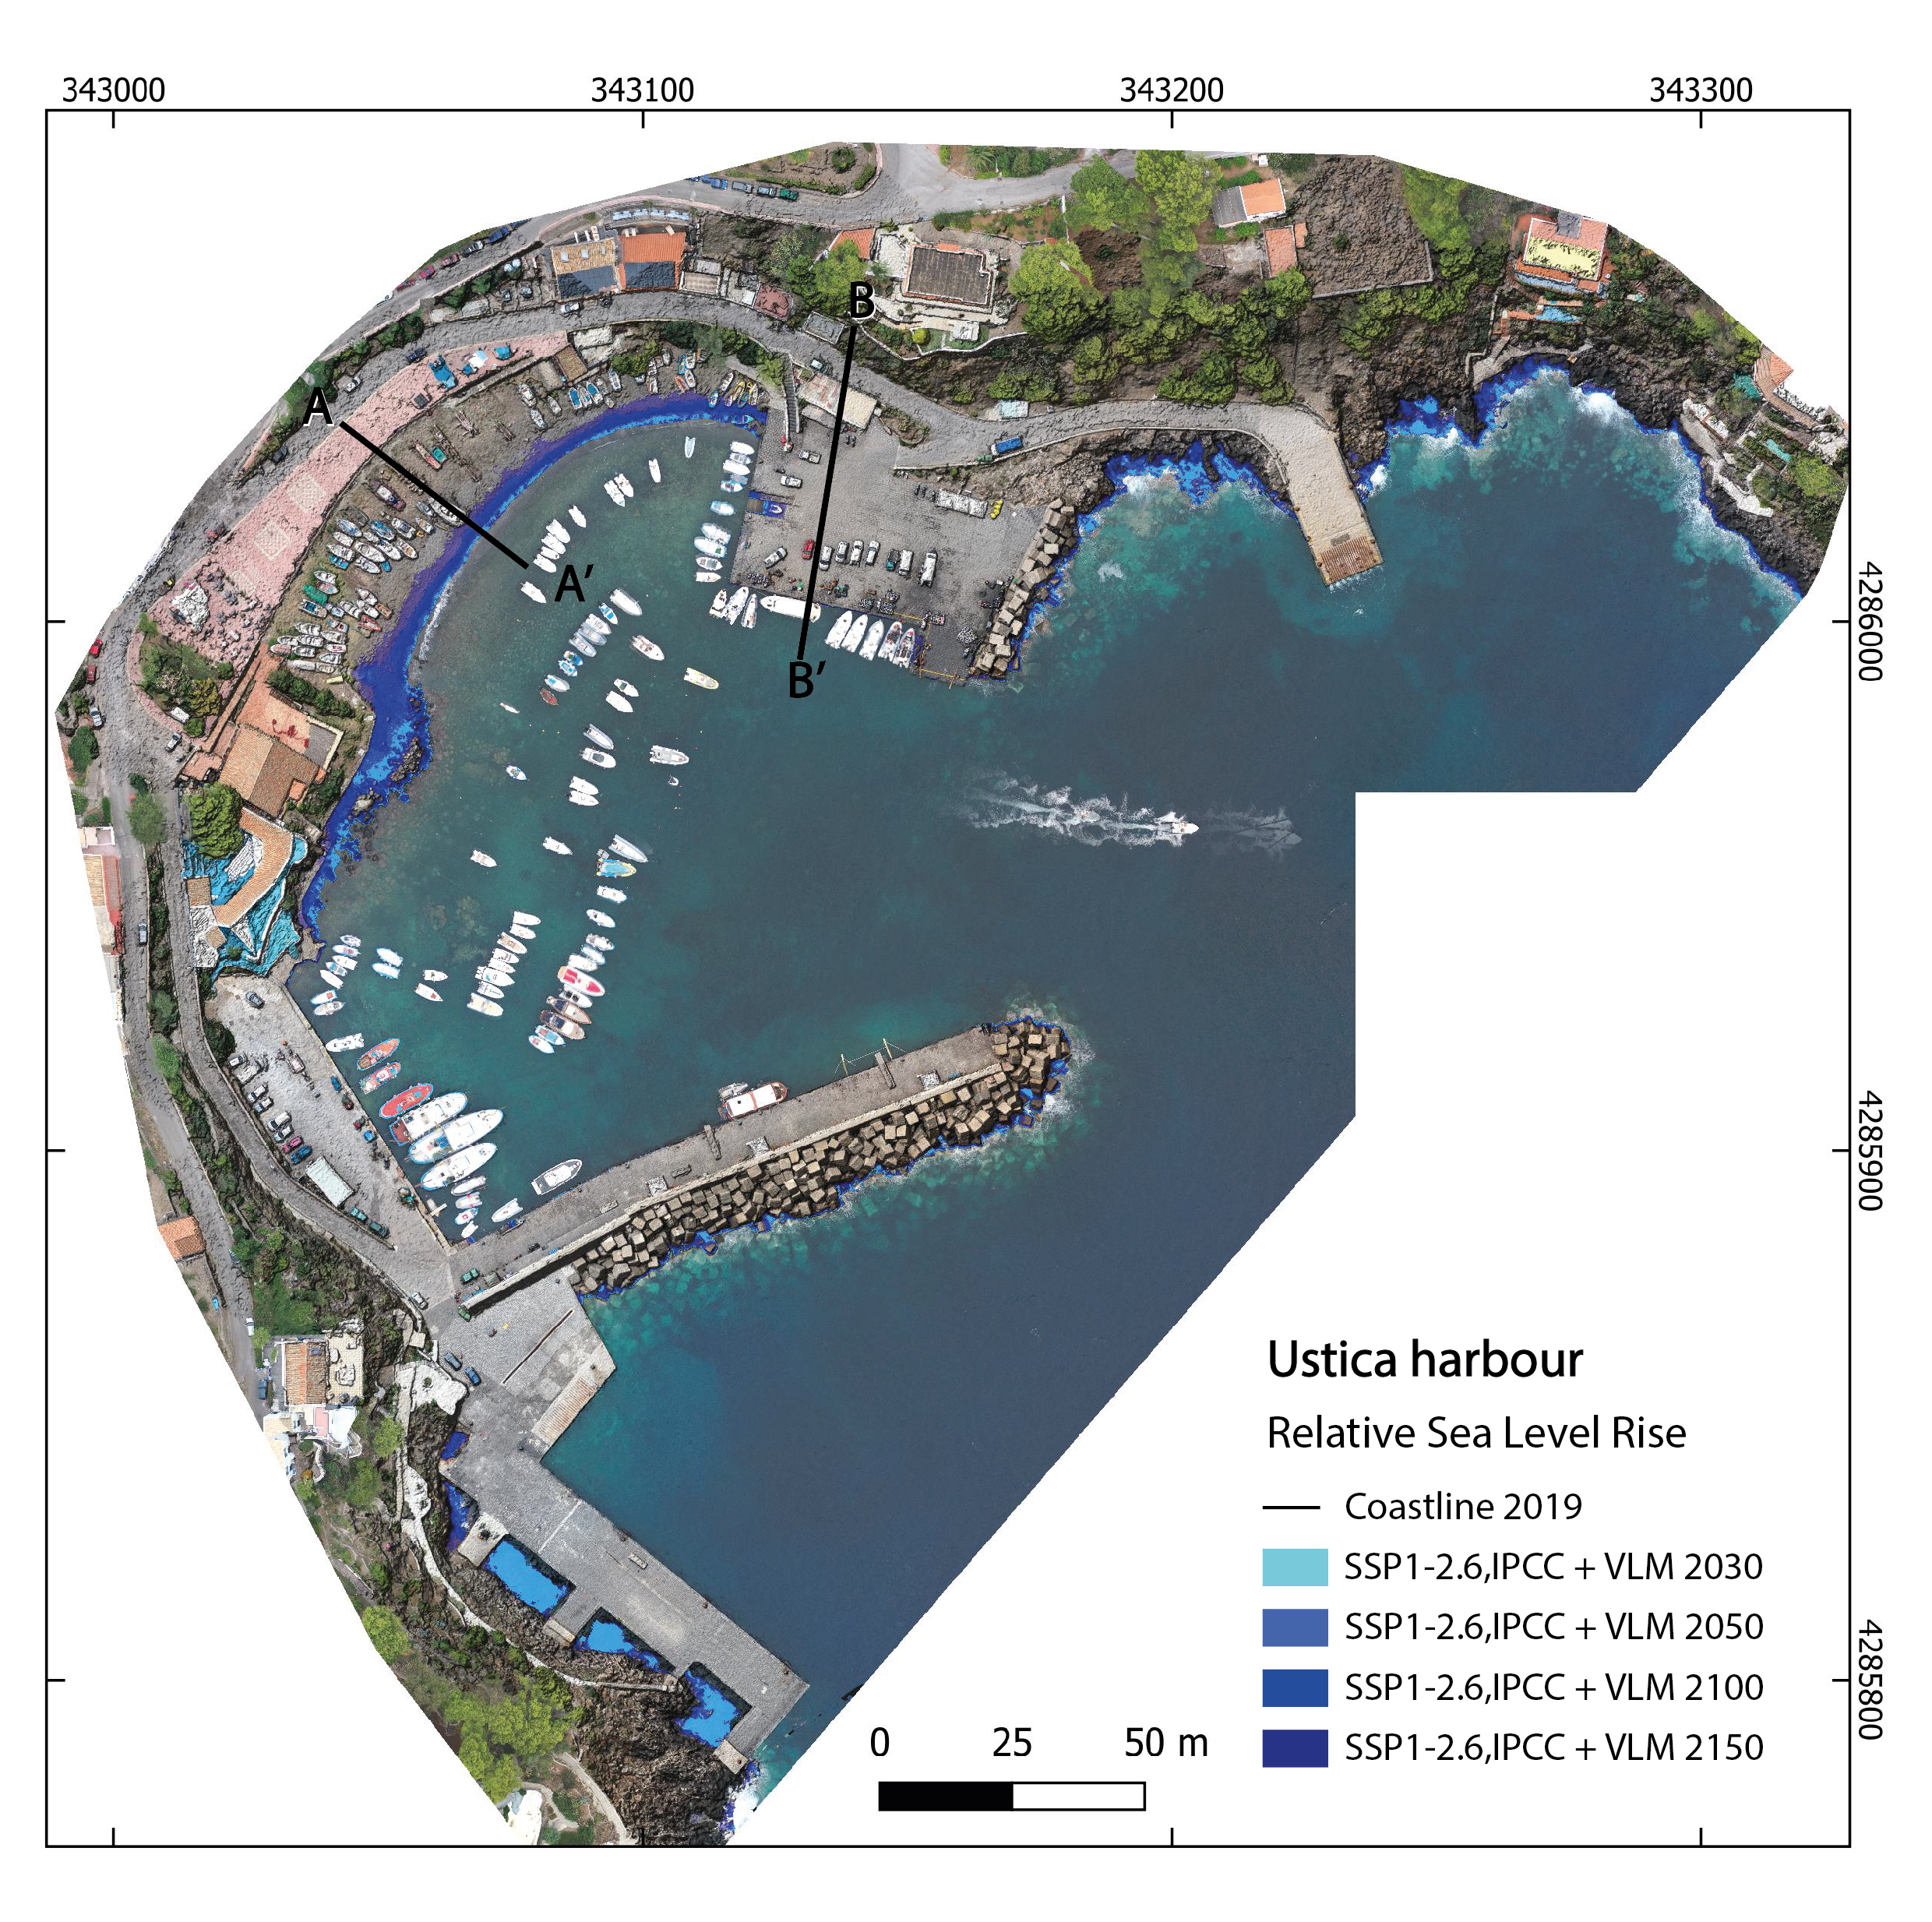

Supplement: s1 [file s1 › Fig.S4_Ustica harbor_SLR_map_1_26.jpg]

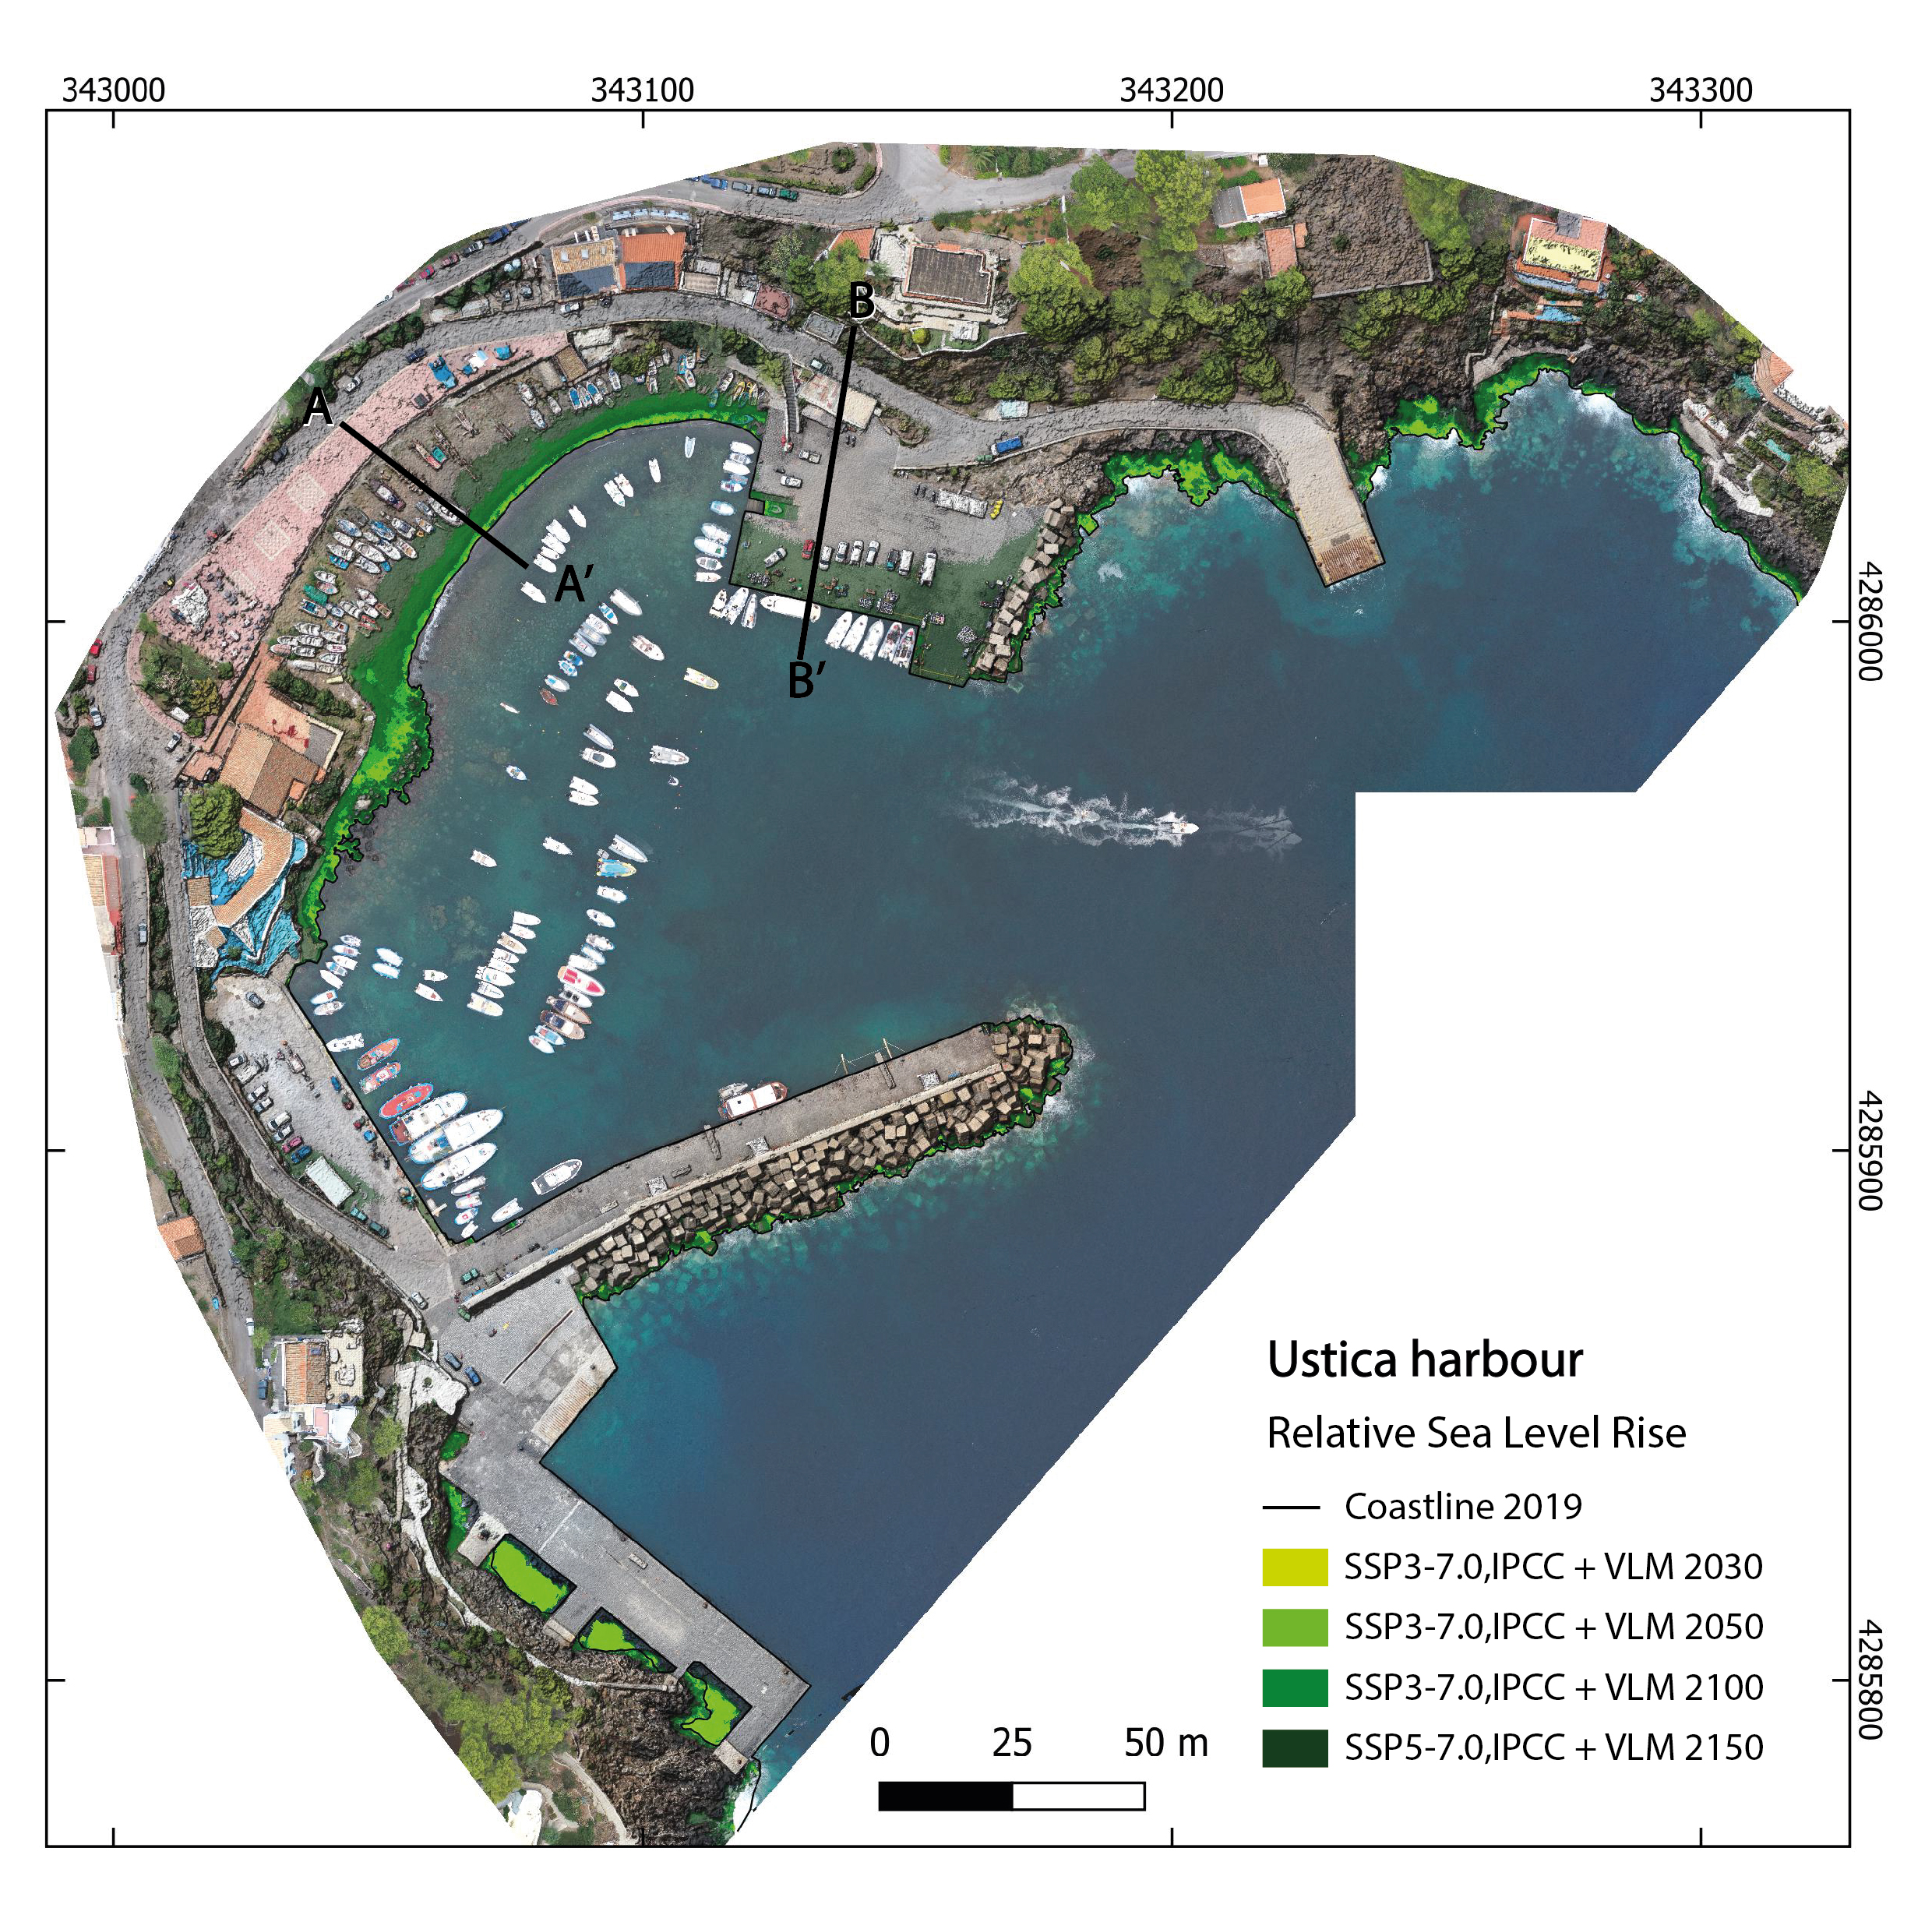

Supplement: s1 [file s1 › Fig.S5_Ustica harbor_SLR_map_3_70.jpg]

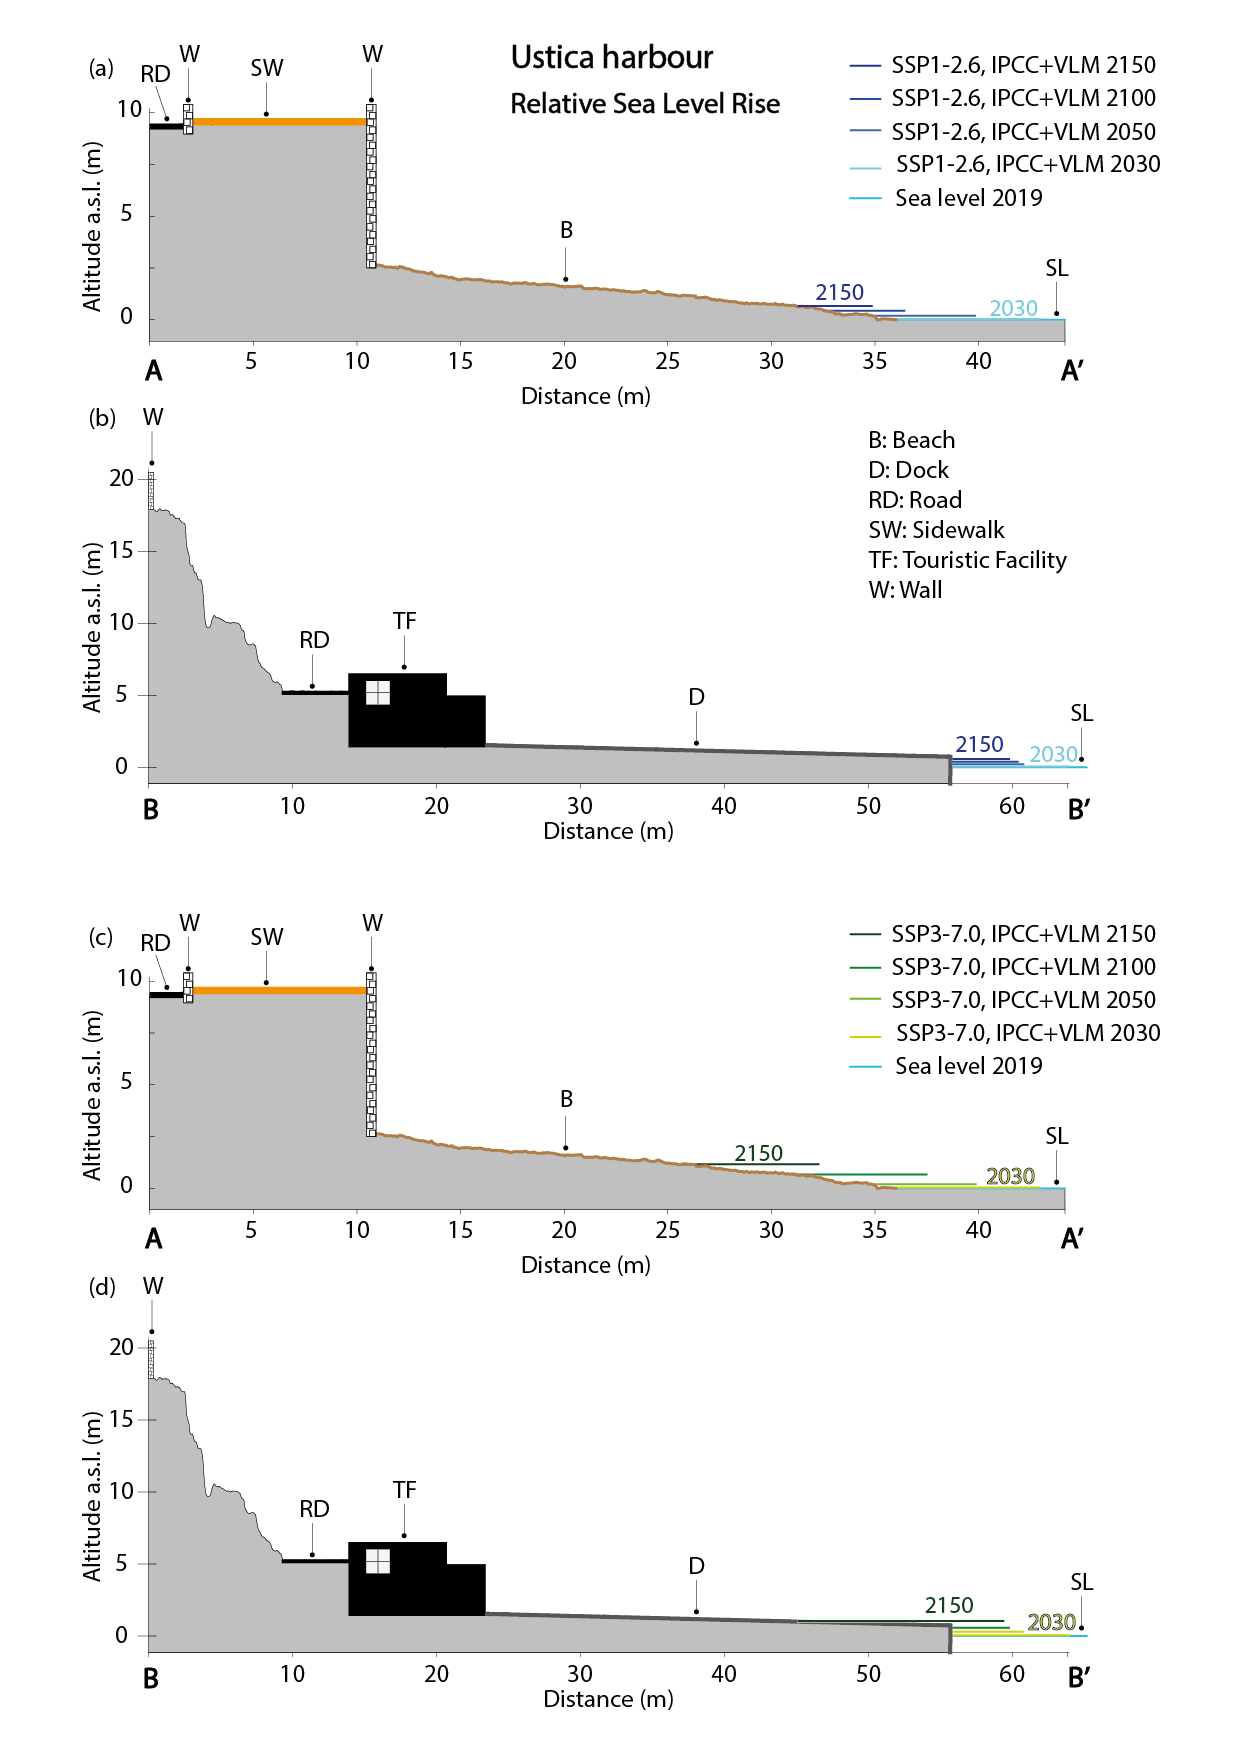

Supplement: s1 [file s1 › Fig.S6_Ustica harbor_SLR_sezioni_1_26_3_70.jpg]

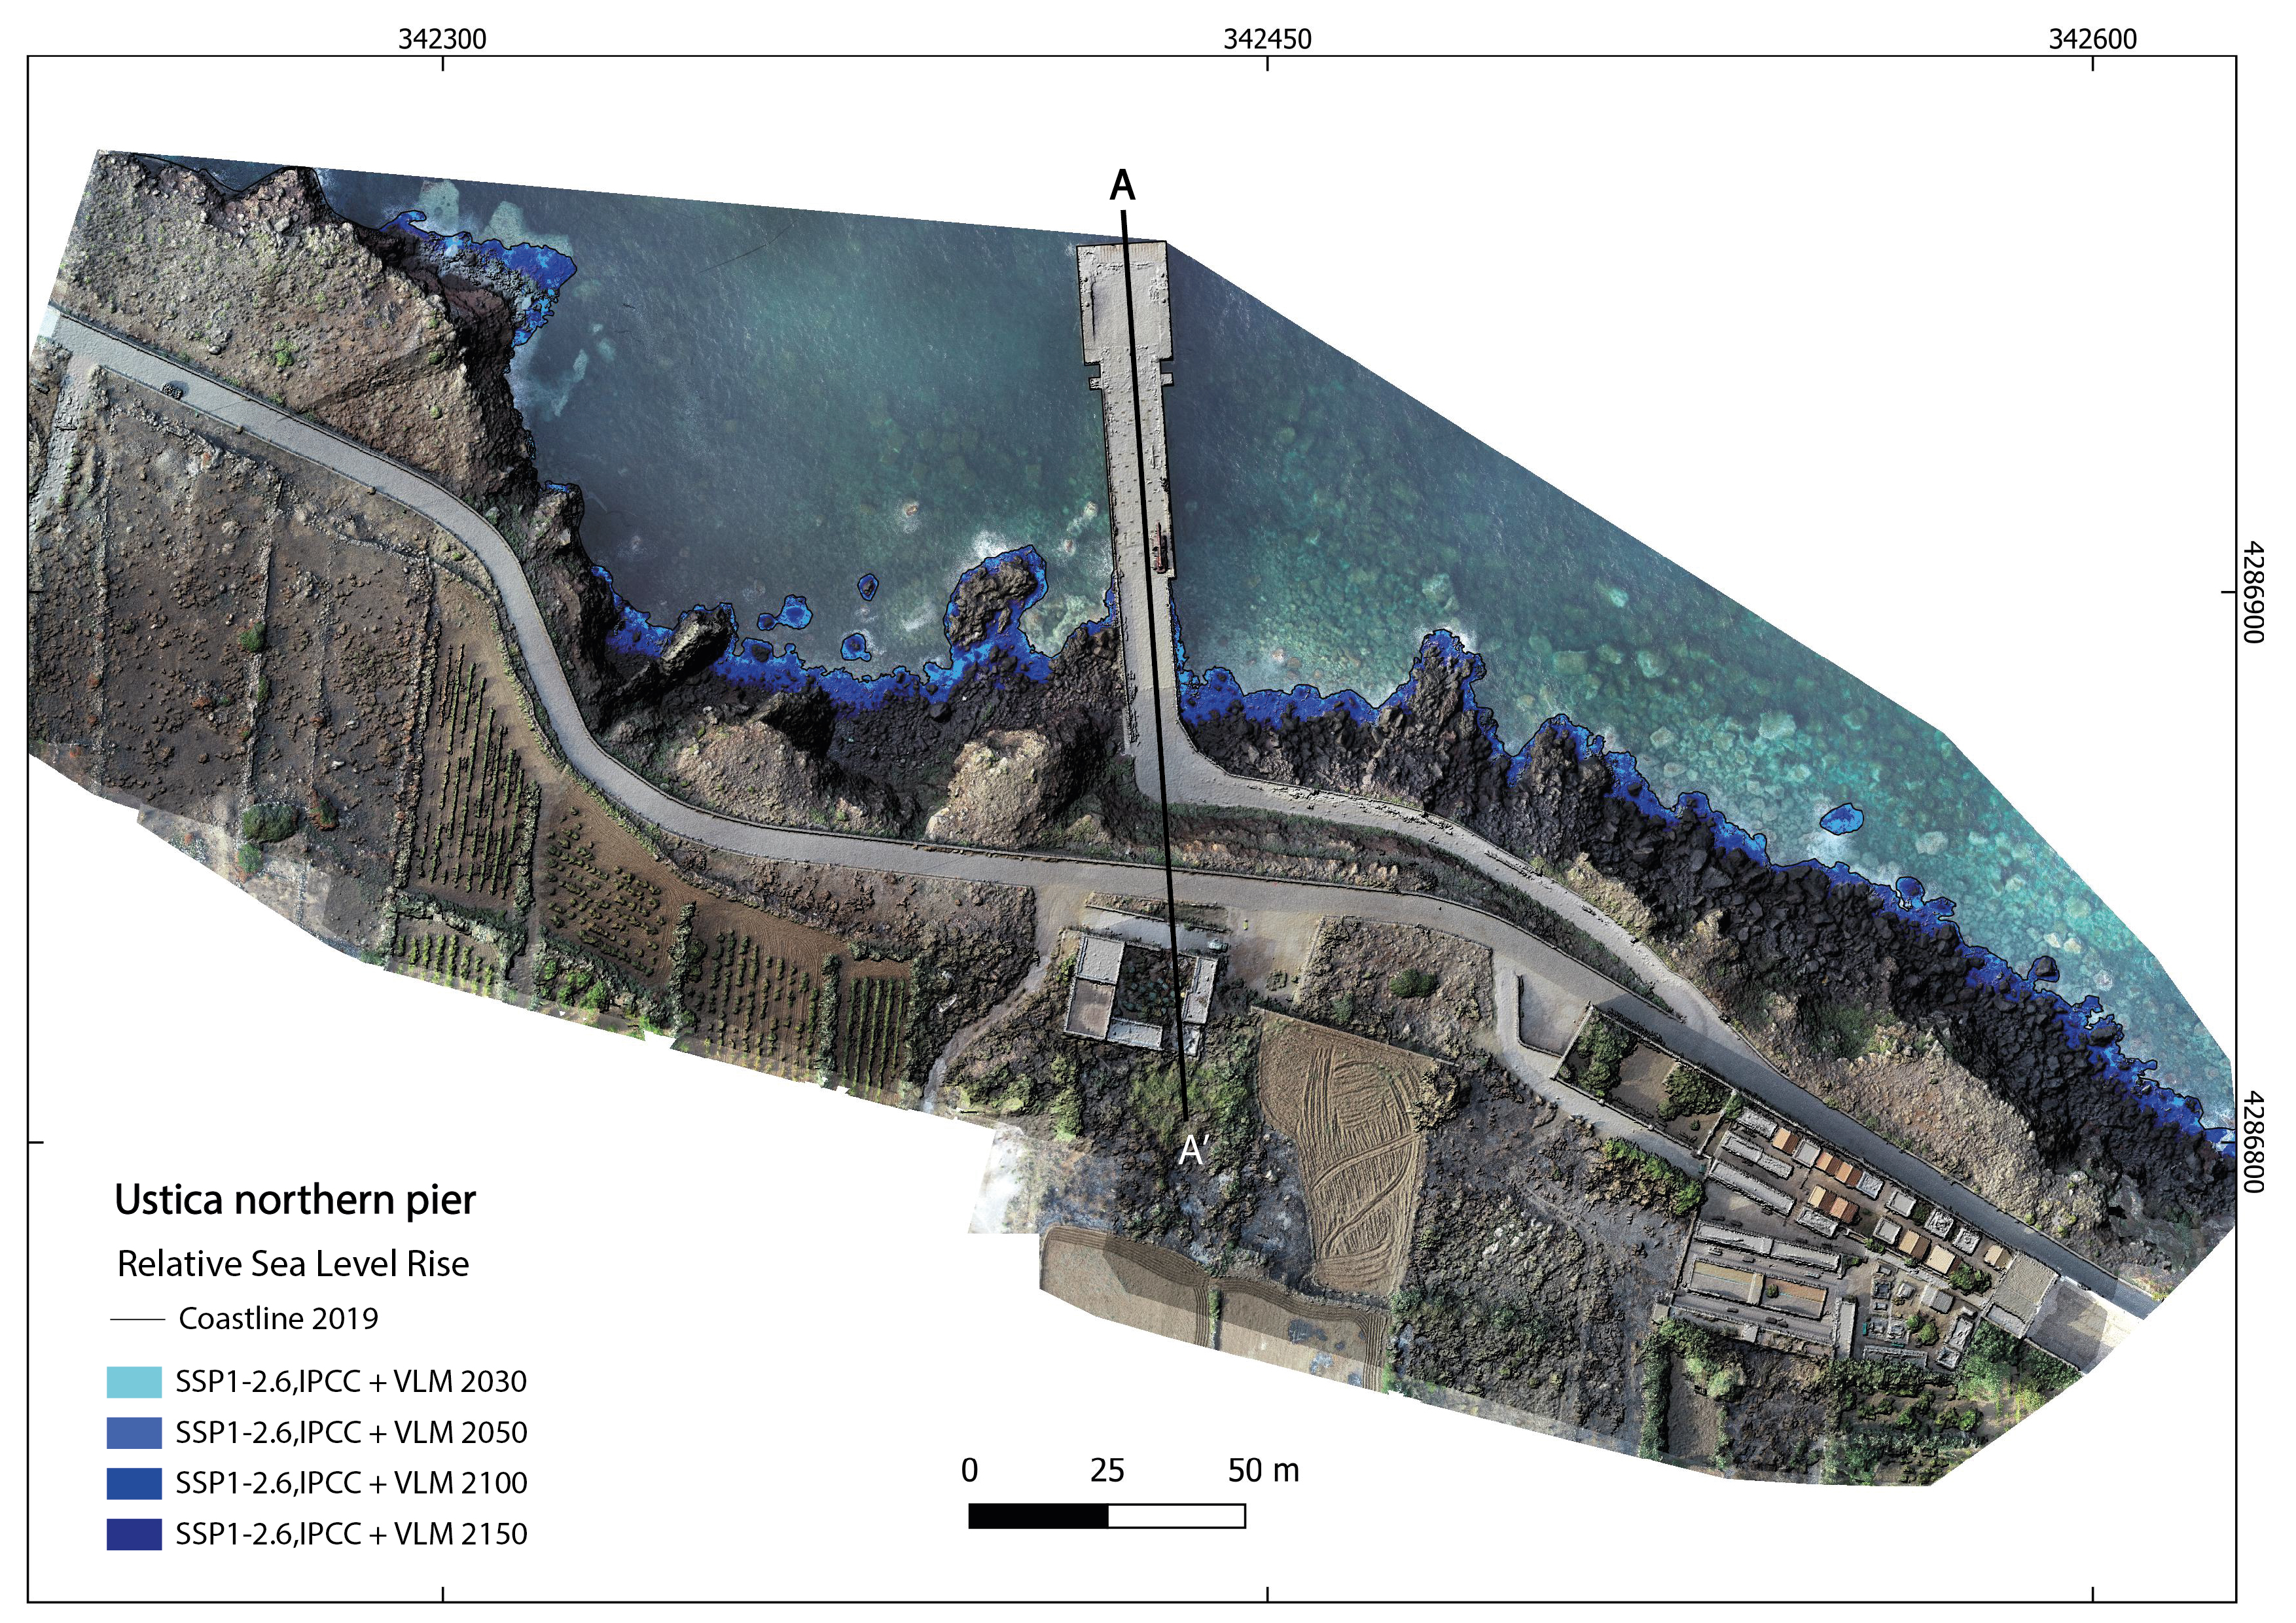

Supplement: s1 [file s1 › Fig.S7_NPier_SLR_map_1_26.jpg]

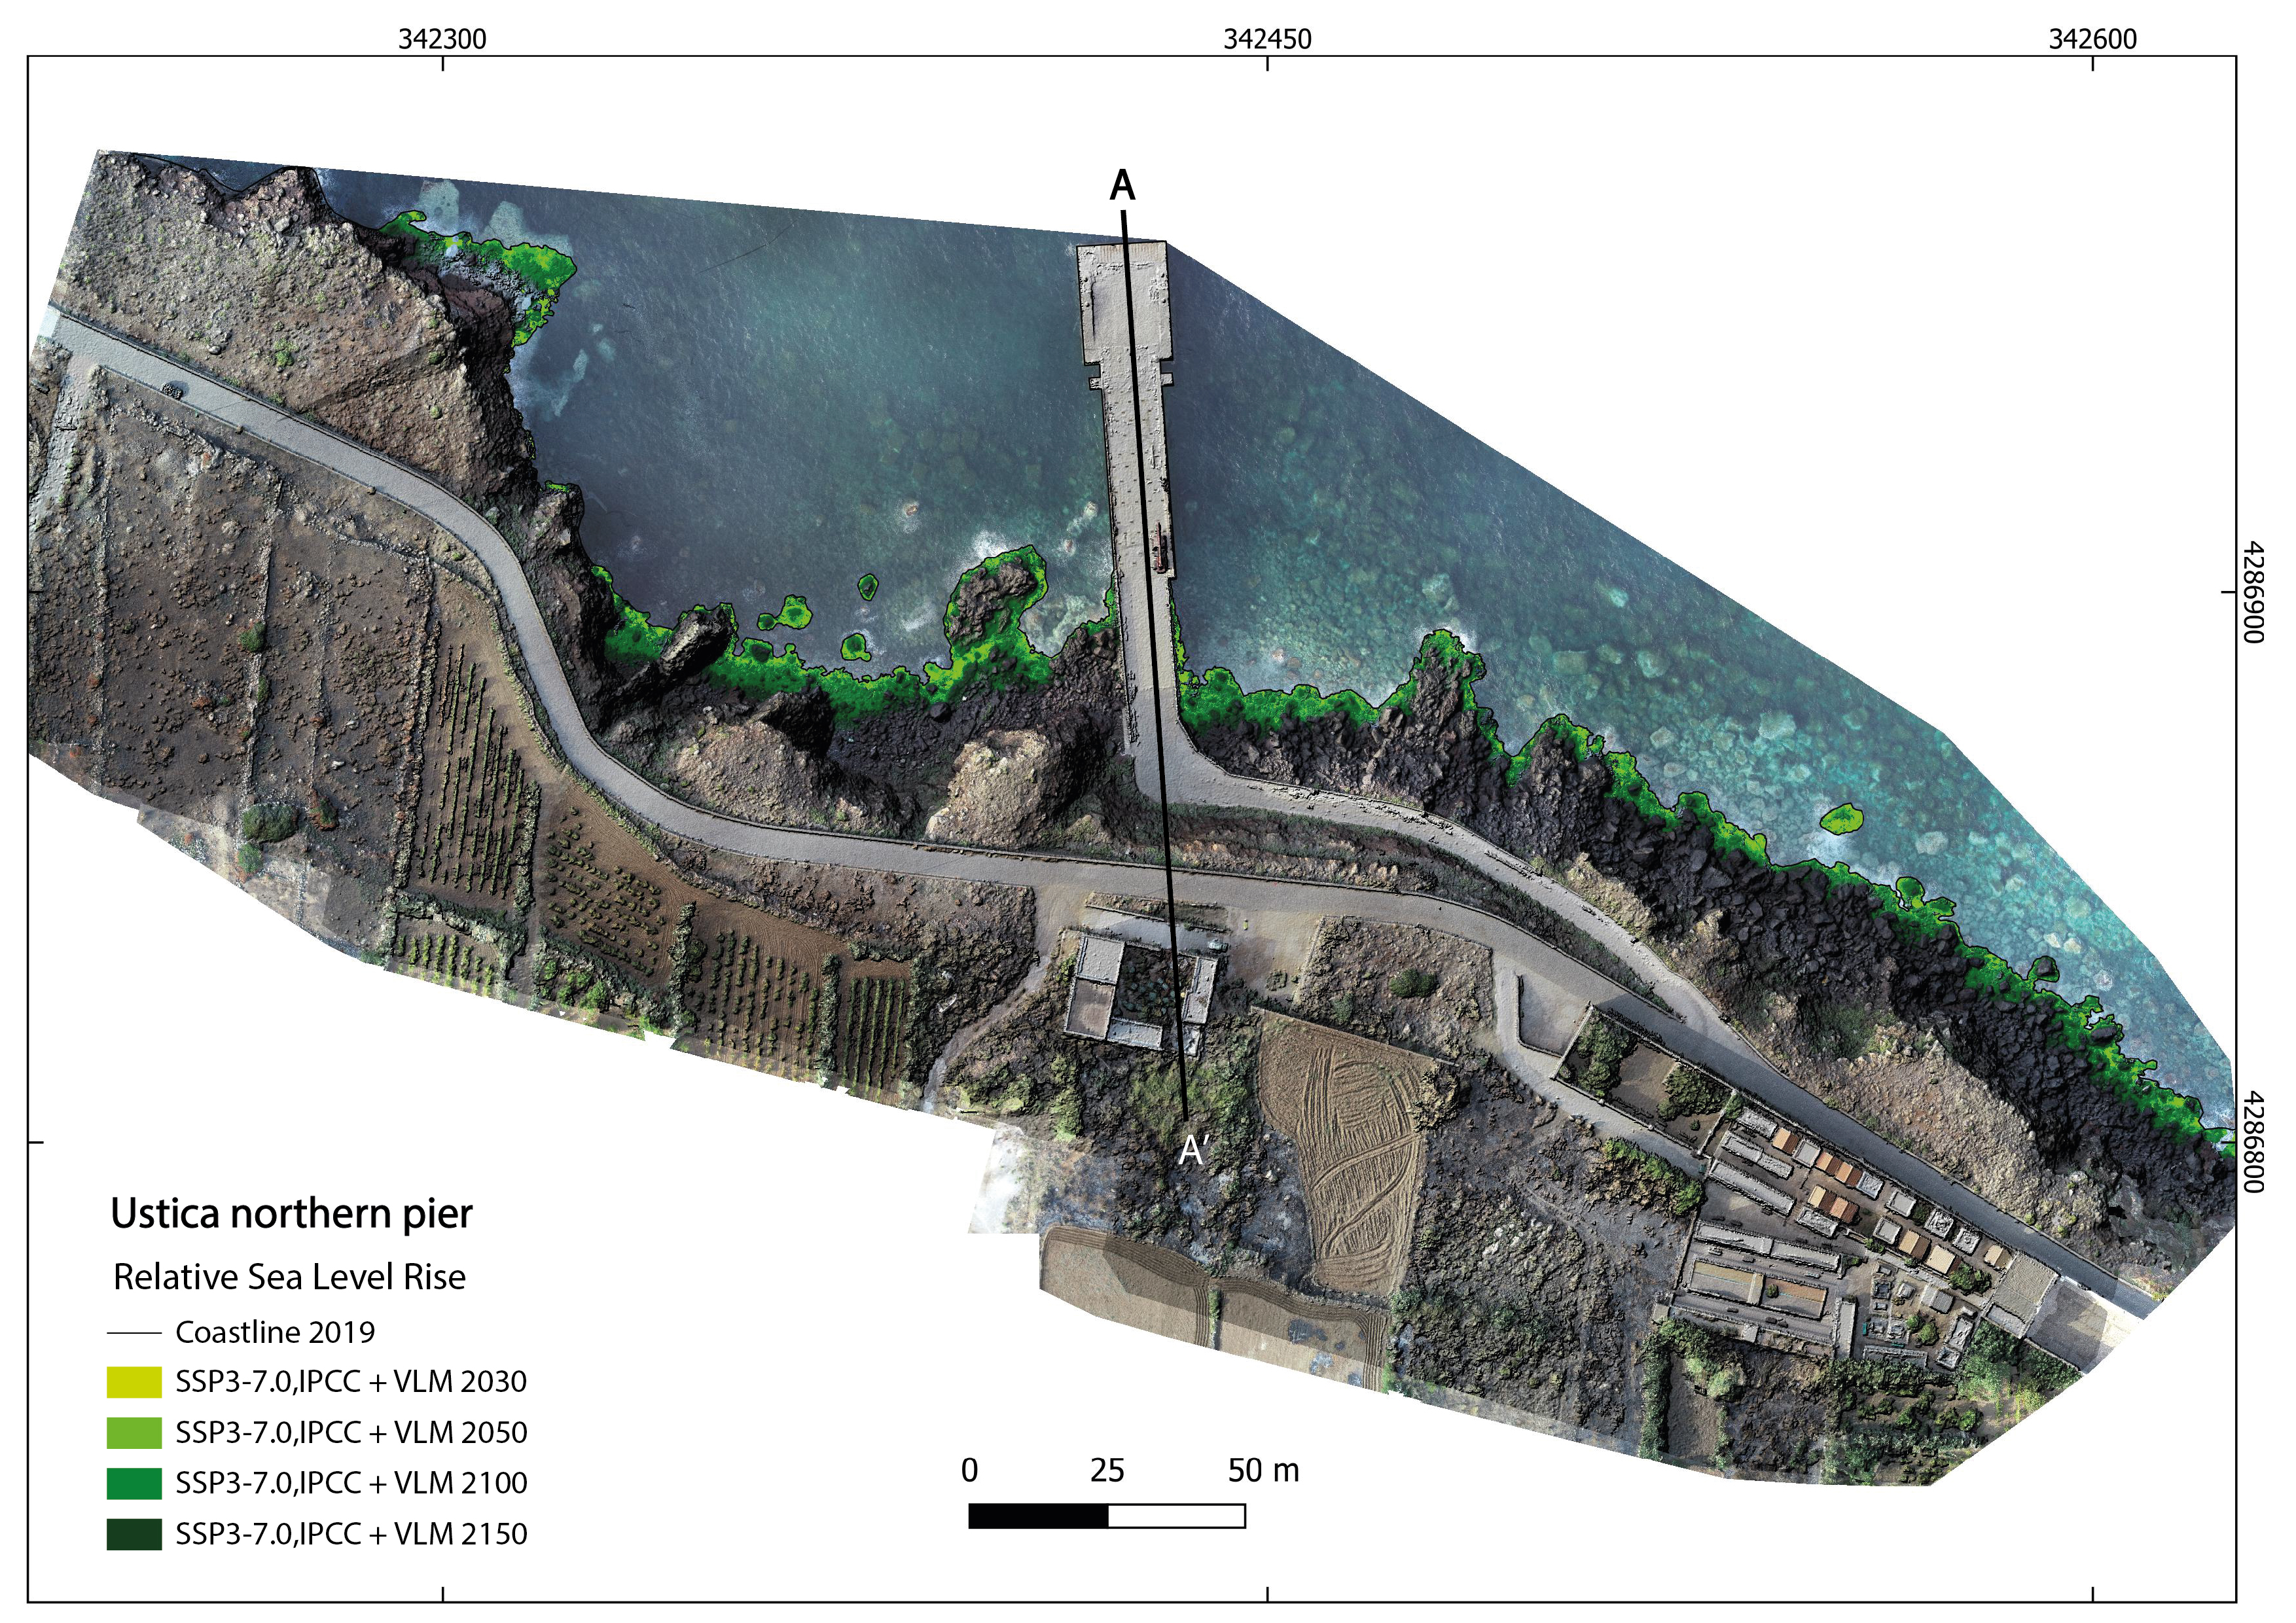

Supplement: s1 [file s1 › Fig.S8_NPier_SLR_map_3_70.jpg]

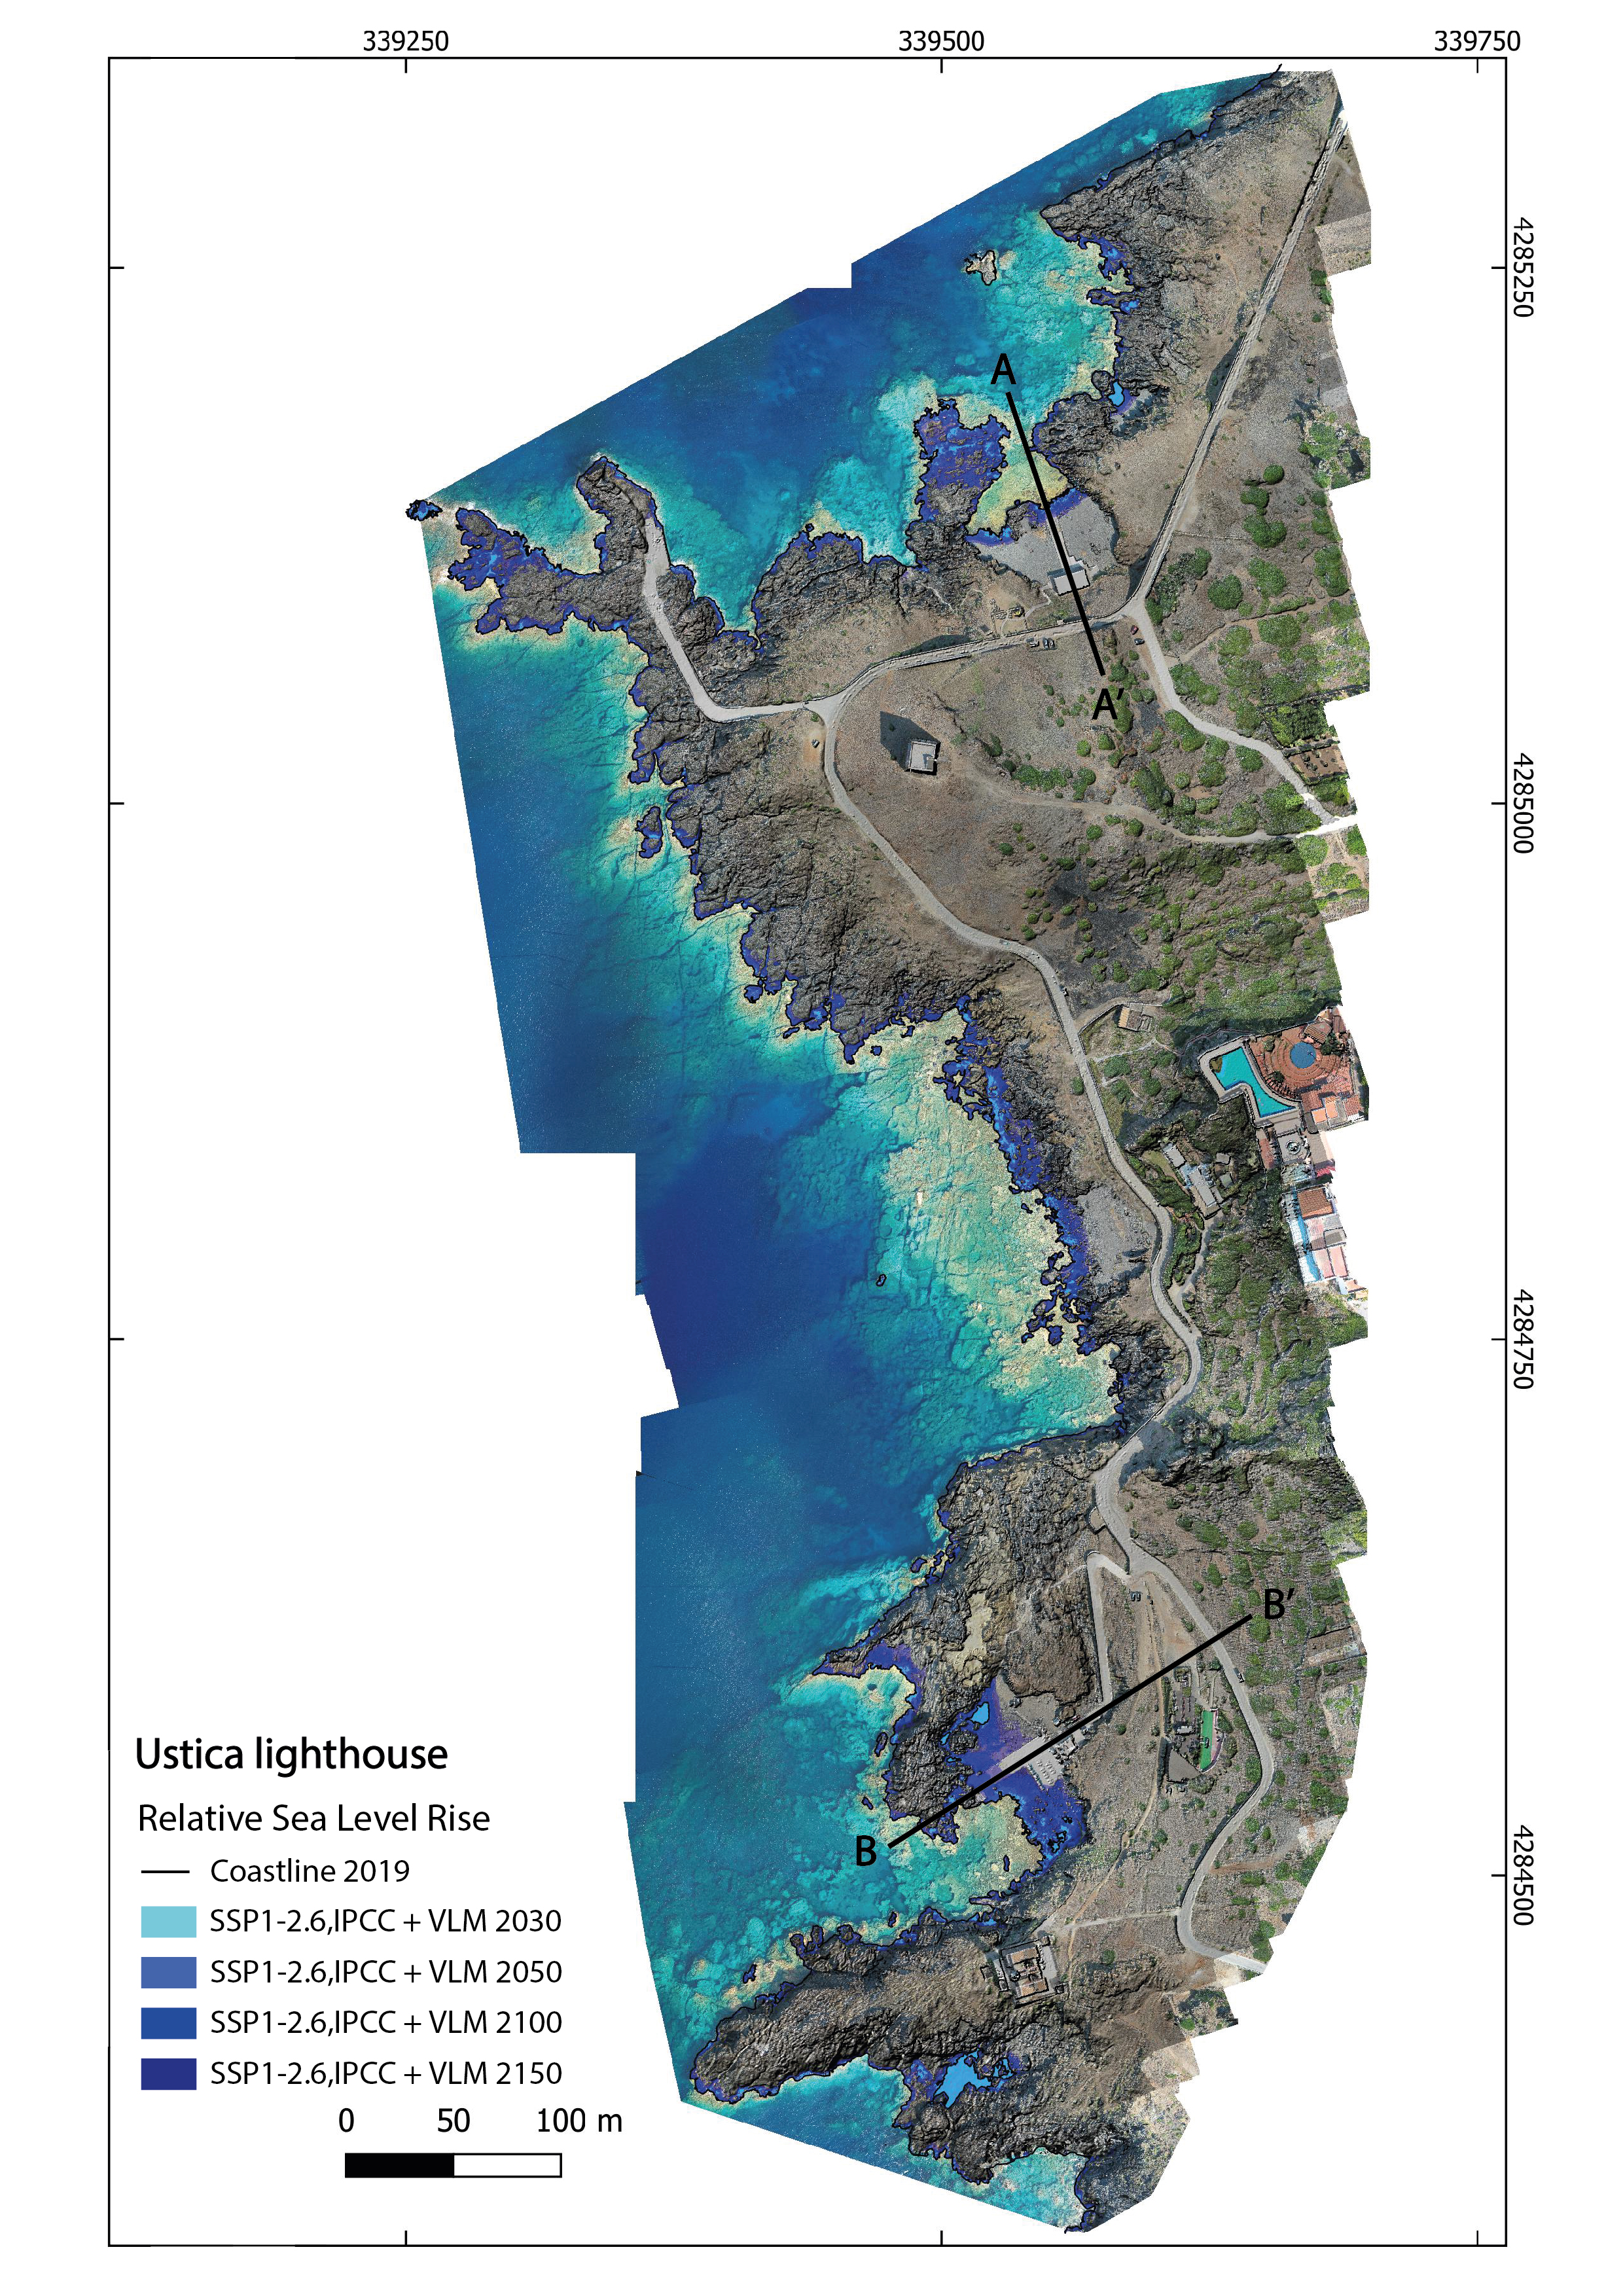

Supplement: s1 [file s1 › Fig.S9_lighthouse_SLR_map_1_26.jpg]
